# Supplementary material
Source: HighWire-hosted journal article supplement (https://www.jpn.ca/highwire/filestream/89770/field_highwire_adjunct_files/0/jpn-130269-1-at.pdf)
Supplement: jpn-130269-1-at.pdf [file jpn-130269-1-at.pdf]

DOI: 10.1503/jpn.130269

Copyright © 2014 The Author(s) or their employer(s). To receive this resource in an accessible format, please contact us at [cmajgroup@cmaj.ca](mailto:cmajgroup@cmaj.ca).

## Supplementary Methods

### *Animals, experimental procedure and tissue dissection*

A subset of samples derived from a previous experiment involving genome-wide mRNA expression profiling after a brief period of enriched environment (EE) in the rat barrel cortex was used in this study.<sup>1</sup> Briefly, young adult male Long Evans rats (Harlan) were housed 2 per cage under standard conditions and divided in 2 experimental groups: control ( $n = 4$ ) and EE ( $n = 8$ ). On the test day, control animals remained in their home-cages and EE animals were allowed to explore a cage enriched with several tools and textures for 30 minutes. The rats were decapitated immediately after the end of the control or EE session, followed by brain extraction and barrel cortex dissection by micropunch.<sup>1</sup> Tissue samples were stored at  $-80^{\circ}\text{C}$ .

### *Neuronal cell cultures and transfections*

Primary cultures of cortical neurons were prepared from embryonic day 18 rats<sup>2</sup> and maintained in a neurobasal medium supplemented with B27 (Invitrogen) and 2 mmol/L glutamine. Locked nucleic acid miR-137 inhibitor (anti-miR-137), as well as nontargeting control (NT) were obtained from Exiqon and were transfected into primary neurons at 6 DIV using lipofectamine 2000 (Invitrogen).

### *RNA Isolation*

RNA from tissue samples was isolated with TRIzol reagent (Invitrogen) after homogenization of the tissue with a TissueLyser (Retsch GmbH). RNA from cell suspensions of primary cortical neurons was isolated using the NucleoSpin RNA II RNA isolation kit (Machery-Nagel), 24 hours after transfection with NTC or anti-miR-137. RNA concentration and quality was determined with a Nanodrop<sup>TM</sup> ND-1000 spectrophotometer (Thermo Fisher Scientific Inc.), and 1% agarose gel electrophoresis, respectively. The samples were kept at  $-80^{\circ}\text{C}$  until further analysis.

### *Quantitative Polymerase Chain Reaction (qPCR)*

Two  $\mu\text{g}$  of DNase-treated, total RNA from each sample was used for cDNA synthesis, using the RevertAid H Minus First Strand cDNA Synthesis kit (Fermentas Inc.) and the Qiagen miScript Reverse Transcription Kit II (Qiagen), for mRNAs and for precursor (pre-) and mature (mat-) miR-137, respectively. Prior to qPCR analysis, each cDNA sample was diluted 1:10 with MilliQ water. QPCR was performed according to previously described protocols<sup>3,4</sup> using standard cycling conditions, and performing a melting protocol to control for product specificity. The miScript miRNA expression analysis assay (Qiagen) was used for the quantification of mRNAs, pre- and mat-miR-137 levels. While mRNA and pre-miR-137 primers were designed by the investigators, using standard qPCR primer design strategies, we purchased pre-designed mat-miR-137 primers to assess mature miR-137 levels. All Ct values used for analyses were averaged from 2 to 3 replicates and those with high standard deviation ( $>1$ ) were not included in the analyses. For pre- and mat-miR-137, relative expression was calculated using the comparative Ct method,<sup>3</sup> normalized to the expression of U6 snRNA. For all mRNAs, *Ppia*, *Ywhaz* or  $\beta$ -actin were measured as housekeeping genes and the 2 most constant (*Ppia* and *Ywhaz*) were selected with GNorm<sup>5</sup> for normalization.

## Supplementary Results

### *Effect of endogenous miR-137 silencing on the expression of EE-regulated putative miR-137 targets*

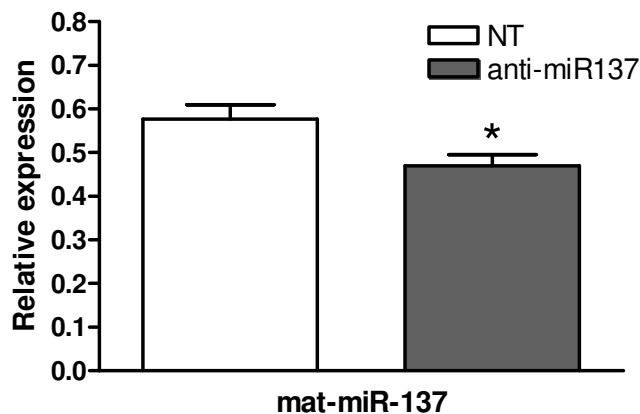

**Fig. S1:** Relative expression of mature miR-137 levels in primary cortical neurons, after transfection with non-targeting anti-miR control (NT) or specific anti-miR137 probes. The treatment with anti-miR137 significantly reduced mature miR-137 levels (two-tailed t-test,  $*p < 0.05$ )

### *Neuronal miR-137-regulated protein network*

In this section, all proteins that were implicated in schizophrenia etiology through direct genetic evidence and/or expression data are indicated in bold. The confirmed miR-137 targets are underlined. The network is shown within a pyramidal neuron, the typical (post)synaptic neocortical neuron.

Glucocorticoids, secreted by the adrenal glands in response to stress, profoundly affect the structure and plasticity of neurons. Glucocorticoid action in neurons is mediated by the **glucocorticoid receptor (GR)** which, upon glucocorticoid binding, migrates from the cytoplasm to the nucleus where it functions as a transcription factor regulating the expression of a wide diversity of genes, including genes that are important for neuronal structure and plasticity.<sup>6,7</sup> Furthermore, the **GR** localizes to dendritic spines — including those from pyramidal neurons in the rat barrel cortex, the model of neuronal plasticity that was used in this study<sup>8</sup> — which implies that the **GR** mediates local glucocorticoid effects on synaptic/neuronal development and plasticity.<sup>9,10</sup>

In this respect, signalling in the network that is shown in Figure 2 of the main article centres around the nucleus where the **GR** acts as a transcription factor that upregulates the expression of **DUSP1**,<sup>11</sup> **EGR1**<sup>12</sup> and **SGK1**<sup>13</sup> and downregulates the expression of **BDNF**<sup>14</sup> and **COX2**.<sup>15</sup> **COX2**, **DUSP1** and **SGK1** are cytoplasmic proteins that are involved in regulating multiple cellular functions, including the modulation of synaptic plasticity.<sup>16–19</sup> **DUSP1** expression increases upon **COX2** activation,<sup>20</sup> whereas **COX2** expression is downregulated by **DUSP1**.<sup>21</sup> Moreover, **BDNF**, an extracellular growth factor that plays a key role in modulating synaptic plasticity,<sup>22,23</sup> is involved in activating **SGK1**<sup>24</sup> and upregulating **DUSP1** expression.<sup>25</sup> In addition, **BDNF** is involved in upregulating the expression of **GRIN1**,<sup>26</sup> the most important subunit of the NMDA glutamate receptor that has a crucial function in regulating synaptic plasticity.<sup>27,28</sup> Furthermore, after being activated through binding glutamate, the NMDA receptor composed of **GRIN1** and other subunits inhibits the entry of calcium ions into the neuron through the voltage-dependent L-type calcium channel **CACNA1C**,<sup>29</sup> which itself has been linked to the modulation of synaptic plasticity through NMDA receptor-independent signaling.<sup>30</sup> An increase in intracellular

calcium concentration directly activates **SGK1**<sup>31</sup> and strongly inhibits the activity of **TCF4**,<sup>32</sup> a transcription factor that upregulates **BDNF** expression<sup>33</sup> and is itself upregulated by **EGR1**,<sup>34</sup> another transcription factor that has been implicated in regulating synaptic plasticity.<sup>35,36</sup> **EGR1** also downregulates **SGK1** expression<sup>37</sup> while it upregulates the expression of **DUSP4**,<sup>38</sup> a protein that belongs to the same family of phosphatases as **DUSP1** and is found in both the nucleus and cytoplasm, where it directly binds and interacts with **GRIN1** in NMDA receptor protein complexes.<sup>39</sup> Furthermore, **EGR2**, another synaptic plasticity-linked transcription factor,<sup>35,36</sup> upregulates **EGR1** expression,<sup>40</sup> and the expression of both **EGR1** and **EGR2** is positively regulated through **BDNF** signalling.<sup>25</sup>

Finally, **TCF4** is directly bound and functionally inhibited by **DDIT3**,<sup>41</sup> a transcription factor that negatively regulates synaptic plasticity<sup>42</sup> and is upregulated by the **ZNF804A** transcription factor.<sup>43</sup> Intriguingly, apart from within **BDNF** (see above), binding sites for **TCF4** have also been identified within or in close vicinity of **DUSP4**, **GRIN1** and **ZNF804A**,<sup>44</sup> which suggests that **TCF4** may regulate the expression of these three network genes as well.

Genetic evidence and/or mRNA/protein expression data implicating the genes encoding 12 proteins from the molecular network discussed above in schizophrenia etiology (**BDNF**; **CACNA1C**; **DUSP1**; **DUSP4**; **EGR1**; **EGR2**; **GRIN1**; **NR3C1**, which encodes the GR protein; **PTGS2**, which encodes the COX2 protein; **SGK1**; **TCF4**; and **ZNF804A**) is shown in Table S1.

**Table S1: Genetic evidence and/or mRNA/protein expression data (part 1 of 2)**

| Gene           | Genetic evidence                                                                                                                                                  | Expression data                                                                                                                                                                                                                                        |
|----------------|-------------------------------------------------------------------------------------------------------------------------------------------------------------------|--------------------------------------------------------------------------------------------------------------------------------------------------------------------------------------------------------------------------------------------------------|
| <i>BDNF</i>    | Ample evidence of genetic association with schizophrenia and altered <i>BDNF</i> expression in patients with schizophrenia (see recent reviews <sup>45,46</sup> ) | —                                                                                                                                                                                                                                                      |
| <i>CACNA1C</i> | Genome-wide significant association with schizophrenia <sup>47</sup>                                                                                              | —                                                                                                                                                                                                                                                      |
| <i>DUSP1</i>   | —                                                                                                                                                                 | <i>DUSP1</i> expression is increased in peripheral blood mononuclear cells of treatment-naïve patients with schizophrenia <sup>48</sup>                                                                                                                |
| <i>DUSP4</i>   | —                                                                                                                                                                 | <i>DUSP4</i> expression is decreased in the postmortem cerebellum of patients with schizophrenia <sup>49</sup>                                                                                                                                         |
| <i>EGR1</i>    | —                                                                                                                                                                 | <i>EGR1</i> expression is decreased in the postmortem prefrontal cortex of patients with schizophrenia <sup>50,51</sup> ; <i>EGR1</i> expression is increased in whole blood of patients with schizophrenia in a highly delusional state <sup>52</sup> |
| <i>EGR2</i>    | Genetic association with schizophrenia in female patients <sup>53</sup>                                                                                           | <i>EGR2</i> expression is decreased in the postmortem prefrontal cortex of patients with schizophrenia <sup>50</sup> ; <i>EGR2</i> expression is increased in lymphoblastoid cell lines of female patients with schizophrenia <sup>53</sup>            |
| <i>GRIN1</i>   | Genetic association with schizophrenia <sup>54,55</sup> ; <i>Grin1</i> knockdown mice constitute a validated animal model of schizophrenia <sup>56</sup>          | —                                                                                                                                                                                                                                                      |
| <i>NR3C1</i>   | —                                                                                                                                                                 | <i>NR3C1</i> expression is decreased in several postmortem brain regions of patients with schizophrenia <sup>57–59</sup>                                                                                                                               |
| <i>PTGS2</i>   | Genetic association with schizophrenia <sup>60</sup>                                                                                                              | —                                                                                                                                                                                                                                                      |
| <i>SGK1</i>    | —                                                                                                                                                                 | <i>Sgk1</i> expression is increased in rat brain after administration of the commonly used antipsychotic drug clozapine <sup>61</sup>                                                                                                                  |
| <i>TCF4</i>    | Genome-wide significant association with schizophrenia <sup>62</sup> ; genetic association with a number of schizophrenia endophenotypes <sup>63</sup>            | <i>TCF4</i> expression is increased in patients with schizophrenia and correlates with positive and negative schizophrenia symptom levels <sup>63</sup>                                                                                                |
| <i>ZNF804A</i> | Genome-wide significant association with schizophrenia in multiple studies (see a recent review <sup>43</sup> )                                                   | —                                                                                                                                                                                                                                                      |

## References

- Vallès A, Boender AJ, Gijsbers S, et al. Genomewide analysis of rat barrel cortex reveals time- and layer-specific mRNA expression changes related to experience-dependent plasticity. *J Neurosci* 2011;31:6140-58.
- Smart F, Aschrafi A, Atkins A, et al. Two isoforms of the cold-inducible mRNA-binding protein RBM3 localize to dendrites and promote translation. *J Neurochem* 2007;101:1367-79.
- Schmittgen TD, Livak KJ. Analyzing real-time PCR data by the comparative C(T) method. *Nat Protoc* 2008;3:1101-8.
- Schmittgen TD, Lee EJ, Jiang J, et al. Real-time PCR quantification of precursor and mature microRNA. *Methods* 2008;44:31-8.
- Vandesompele J, De Preter K, Pattyn F, et al. Accurate normalization of real-time quantitative RT-PCR data by geometric averaging of multiple internal control genes. *Genome Biol* 2002;3:RESEARCH0034.
- Polman JA, Welten JE, Bosch DS, et al. A genome-wide signature of glucocorticoid receptor binding in neuronal PC12 cells. *BMC Neurosci* 2012;13:118.
- Datson NA, Morsink MC, Meijer OC, et al. Central corticosteroid actions: Search for gene targets. *Eur J Pharmacol* 2008;583:272-89.
- Liston C, Gan WB. Glucocorticoids are critical regulators of dendritic spine development and plasticity in vivo. *Proc Natl Acad Sci U S A* 2011;108:16074-9.
- Jafari M, Seese RR, Babayan AH, et al. Glucocorticoid receptors are localized to dendritic spines and influence local actin signaling. *Mol Neurobiol* 2012;46:304-15.
- Liston C, Cichon JM, Jeanneteau F, et al. Circadian glucocorticoid oscillations promote learning-dependent synapse formation and maintenance. *Nat Neurosci* 2013;16:698-705.
- Shipp LE, Lee JV, Yu CY, et al. Transcriptional regulation of human dual specificity protein phosphatase 1 (DUSP1) gene by glucocorticoids. *PLoS One* 2010;5:e13754.
- Revest JM, Di Blasi F, Kitchener P, et al. The MAPK pathway and Egr-1 mediate stress-related behavioral effects of glucocorticoids. *Nat Neurosci* 2005;8:664-72.
- Mikosz CA, Brickley DR, Sharkey MS, et al. Glucocorticoid receptor-mediated protection from apoptosis is associated with induction of the serine/threonine survival kinase gene, sgk-1. *J Biol Chem* 2001;276:16649-54.
- Chao HM, Sakai RR, Ma LY, et al. Adrenal steroid regulation of neurotrophic factor expression in the rat hippocampus. *Endocrinology* 1998;139:3112-8.
- Wang JC, Derynck MK, Nonaka DF, et al. Chromatin immunoprecipitation (ChIP) scanning identifies primary glucocorticoid receptor target genes. *Proc Natl Acad Sci U S A* 2004;101:15603-8.
- Koch H, Huh SE, Elsen FP, et al. Prostaglandin E2-induced synaptic plasticity in neocortical networks of organotypic slice cultures. *J Neurosci* 2010;30:11678-87.
- Davis S, Vanhoutte P, Pages C, et al. The MAPK/ERK cascade targets both Elk-1 and cAMP response element-binding protein to control long-term potentiation-dependent gene expression in the dentate gyrus in vivo. *J Neurosci* 2000;20:4563-72.
- Chao CC, Ma YL, Lee EH. Protein kinase CK2 impairs spatial memory formation through differential cross talk with PI-3 kinase signaling: activation of Akt and inactivation of SGK1. *J Neurosci* 2007;27:6243-8.
- Tai DJ, Su CC, Ma YL, et al. SGK1 phosphorylation of IkappaB Kinase alpha and p300 Up-regulates NF-kappaB activity and increases N-Methyl-D-aspartate receptor NR2A and NR2B expression. *J Biol Chem* 2009;284:4073-89.
- Choudhary S, Huang H, Raisz L, et al. Anabolic effects of PTH in cyclooxygenase-2 knockout osteoblasts in vitro. *Biochem Biophys Res Commun* 2008;372:536-41.
- Turpeinen T, Nieminen R, Moilanen E, et al. Mitogen-activated protein kinase phosphatase-1 negatively regulates the expression of interleukin-6, interleukin-8, and cyclooxygenase-2 in A549 human lung epithelial cells. *J Pharmacol Exp Ther* 2010;333:310-8.
- Leal G, Comprido D, Duarte CB. BDNF-induced local protein synthesis and synaptic plasticity. *Neuropharmacology* 2014;76:639-56.
- Lu B, Nagappan G, Guan X, et al. BDNF-based synaptic repair as a disease-modifying strategy for neurodegenerative diseases. *Nat Rev Neurosci* 2013;14:401-16.
- Poser S, Impey S, Xia Z, et al. Brain-derived neurotrophic factor protection of cortical neurons from serum withdrawal-induced apoptosis is inhibited by cAMP. *J Neurosci* 2003;23:4420-7.
- Glorioso C, Sabatini M, Unger T, et al. Specificity and timing of neocortical transcriptome changes in response to BDNF gene ablation during embryogenesis or adulthood. *Mol Psychiatry* 2006;11:633-48.
- Giralt A, Rodrigo T, Martin ED, et al. Brain-derived neurotrophic factor modulates the severity of cognitive alterations induced by mutant huntingtin: involvement of phospholipase Cgamma activity and glutamate receptor expression. *Neuroscience* 2009;158:1234-50.
- Mori F, Ribolsi M, Kusayanagi H, et al. Genetic variants of the NMDA receptor influence cortical excitability and plasticity in humans. *J Neurophysiol* 2011;106:1637-43.
- Umemori J, Takao K, Koshimizu H, et al. ENU-mutagenesis mice with a non-synonymous mutation in Grin1 exhibit abnormal anxiety-like behaviors, impaired fear memory, and decreased acoustic startle response. *BMC Res Notes* 2013;6:203.
- Tsuruta F, Green EM, Rousset M, et al. PIKfyve regulates CaV1.2 degradation and prevents excitotoxic cell death. *J Cell Biol* 2009;187:279-94.
- Moosmang S, Haider N, Klugbauer N, et al. Role of hippocampal Cav1.2 Ca2+ channels in NMDA receptor-independent synaptic plasticity and spatial memory. *J Neurosci* 2005;25:9883-92.
- Imai S, Okayama N, Shimizu M, et al. Increased intracellular calcium activates serum and glucocorticoid-inducible kinase 1 (SGK1) through a calmodulin-calcium calmodulin dependent kinase kinase pathway in Chinese hamster ovary cells. *Life Sci* 2003;72:2199-209.
- Navarrete K, Pedroso I, De Jong S, et al. TCF4 (e2-2; ITF2): a schizophrenia-associated gene with pleiotropic effects on human disease. *Am J Med Genet B Neuropsychiatr Genet* 2013;162:1-16.
- Yi H, Hu J, Qian J, et al. Expression of brain-derived neurotrophic factor is regulated by the Wnt signaling pathway. *Neuroreport* 2012;23:189-94.
- Saegusa M, Hashimura M, Kuwata T, et al. Transcription factor Egr1 acts as an upstream regulator of beta-catenin signalling through up-regulation of TCF4 and p300 expression during trans-differentiation of endometrial carcinoma cells. *J Pathol* 2008;216:521-32.

35. O'Donovan KJ, Tourtellotte WG, Millbrandt J, et al. The EGR family of transcription-regulatory factors: progress at the interface of molecular and systems neuroscience. *Trends Neurosci* 1999;22:167-73.
36. Mengozzi M, Cervellini I, Villa P, et al. Erythropoietin-induced changes in brain gene expression reveal induction of synaptic plasticity genes in experimental stroke. *Proc Natl Acad Sci U S A* 2012;109:9617-22.
37. James AB, Conway AM, Morris BJ. Regulation of the neuronal proteasome by Zif268 (Egr1). *J Neurosci* 2006;26:1624-34.
38. Berasi SP, Huard C, Li D, et al. Inhibition of gluconeogenesis through transcriptional activation of EGR1 and DUSP4 by AMP-activated kinase. *J Biol Chem* 2006;281:27167-77.
39. Husi H, Ward MA, Choudhary JS, et al. Proteomic analysis of NMDA receptor-adhesion protein signaling complexes. *Nat Neurosci* 2000;3:661-9.
40. Nagarajan R, Svaren J, Le N, et al. EGR2 mutations in inherited neuropathies dominant-negatively inhibit myelin gene expression. *Neuron* 2001;30:355-68.
41. Horndasch M, Lienkamp S, Springer E, et al. The C/EBP homologous protein CHOP (GADD153) is an inhibitor of Wnt/TCF signals. *Oncogene* 2006;25:3397-407.
42. Osada N, Kosuge Y, Oguchi S, et al. Protective action of mithramycin against neurodegeneration and impairment of synaptic plasticity in the hippocampal CA1 area after transient global ischemia. *Neurochem Int* 2012;60:47-54.
43. Umeda-Yano S, Hashimoto R, Yamamori H, et al. The regulation of gene expression involved in TGF-beta signaling by ZNF804A, a risk gene for schizophrenia. *Schizophr Res* 2013;146:273-8.
44. Hatzis P, van der Flier LG, van Driel MA, et al. Genome-wide pattern of TCF7L2/TCF4 chromatin occupancy in colorectal cancer cells. *Mol Cell Biol* 2008;28:2732-44.
45. Nurjono M, Lee J, Chong SA. A Review of Brain-derived Neurotrophic Factor as a Candidate Biomarker in Schizophrenia. *Clin Psychopharmacol Neurosci* 2012;10:61-70.
46. Watanabe Y, Nunokawa A, Someya T. Association of the BDNF C270T polymorphism with schizophrenia: updated meta-analysis. *Psychiatry Clin Neurosci* 2013;67:123-5.
47. Hamshere ML, Walters JT, Smith R, et al. Genome-wide significant associations in schizophrenia to ITIH3/4, CACNA1C and SDCCAG8, and extensive replication of associations reported by the Schizophrenia PGC. *Mol Psychiatry* 2013;18:708-12.
48. Kumarasinghe N, Beveridge NJ, Gardiner E, et al. Gene expression profiling in treatment-naïve schizophrenia patients identifies abnormalities in biological pathways involving AKT1 that are corrected by antipsychotic medication. *Int J Neuropsychopharmacol* 2013;1-21.
49. Kyosseva SV, Elbein AD, Griffin WS, et al. Mitogen-activated protein kinases in schizophrenia. *Biol Psychiatry* 1999;46:689-96.
50. Yamada K, Gerber DJ, Iwayama Y, et al. Genetic analysis of the calcineurin pathway identifies members of the EGR gene family, specifically EGR3, as potential susceptibility candidates in schizophrenia. *Proc Natl Acad Sci U S A* 2007;104:2815-20.
51. Perez-Santiago J, Diez-Alarcia R, Callado LF, et al. A combined analysis of microarray gene expression studies of the human prefrontal cortex identifies genes implicated in schizophrenia. *J Psychiatr Res* 2012;46:1464-74.
52. Kurian SM, Le-Niculescu H, Patel SD, et al. Identification of blood biomarkers for psychosis using convergent functional genomics. *Mol Psychiatry* 2011;16:37-58.
53. Cheng MC, Chuang YA, Lu CL, et al. Genetic and functional analyses of early growth response (EGR) family genes in schizophrenia. *Prog Neuropsychopharmacol Biol Psychiatry* 2012;39:149-55.
54. Zhao X, Li H, Shi Y, et al. Significant association between the genetic variations in the 5' end of the N-methyl-D-aspartate receptor subunit gene GRIN1 and schizophrenia. *Biol Psychiatry* 2006;59:747-53.
55. Galehdari H, Pooryasin A, Foroughmand A, et al. Association between the G1001C polymorphism in the GRIN1 gene promoter and schizophrenia in the Iranian population. *J Mol Neurosci* 2009;38:178-81.
56. Moy SS, Nikolova VD, Riddick NV, et al. Prewearing sensorimotor deficits and adolescent hypersociability in Grin1 knockdown mice. *Dev Neurosci* 2012;34:159-73.
57. Webster MJ, Knable MB, O'Grady J, et al. Regional specificity of brain glucocorticoid receptor mRNA alterations in subjects with schizophrenia and mood disorders. *Mol Psychiatry* 2002;7:985-94, 24.
58. Sinclair D, Fullerton JM, Webster MJ, et al. Glucocorticoid receptor 1B and 1C mRNA transcript alterations in schizophrenia and bipolar disorder, and their possible regulation by GR gene variants. *PLoS One* 2012;7:e31720.
59. Sinclair D, Webster MJ, Fullerton JM, et al. Glucocorticoid receptor mRNA and protein isoform alterations in the orbitofrontal cortex in schizophrenia and bipolar disorder. *BMC Psychiatry* 2012;12:84.
60. Wei J, Hemmings GP. A study of a genetic association between the PTGS2/PLA2G4A locus and schizophrenia. *Prostaglandins Leukot Essent Fatty Acids* 2004;70:413-5.
61. Robbins MJ, Critchlow HM, Lloyd A, et al. Differential expression of IEG mRNA in rat brain following acute treatment with clozapine or haloperidol: a semi-quantitative RT-PCR study. *J Psychopharmacol* 2008;22:536-42.
62. Stefansson H, Ophoff RA, Steinberg S, et al. Common variants conferring risk of schizophrenia. *Nature* 2009;460:744-7.
63. Wirgenes KV, Sonderby IE, Haukvik UK, et al. TCF4 sequence variants and mRNA levels are associated with neurodevelopmental characteristics in psychotic disorders. *Transl Psychiatry* 2012;2:e112.
